# Supplementary material for: N-WASP Attenuates Cell Proliferation and Migration through ERK2-Dependent Enhanced Expression of TXNIP
Source: MDPI journal article supplement (doi:10.3390/biology11040582), 2022-04-11
Supplement: s1 [file s1]

# N-WASP Attenuates Cell Proliferation and Migration through ERK2-Dependent Enhanced Expression of TXNIP

Yat Joong Chung <sup>1</sup>, Amrita Salvi <sup>1,†</sup>, Pazhanichamy Kalailingam <sup>1</sup>, Myra Alnawaz <sup>1</sup>, Suat Hoon Tan <sup>2</sup>, Jiun Yit Pan <sup>2</sup>, Nguan Soon Tan <sup>1,3</sup> and Thirumaran Thanabalu <sup>1,\*</sup>

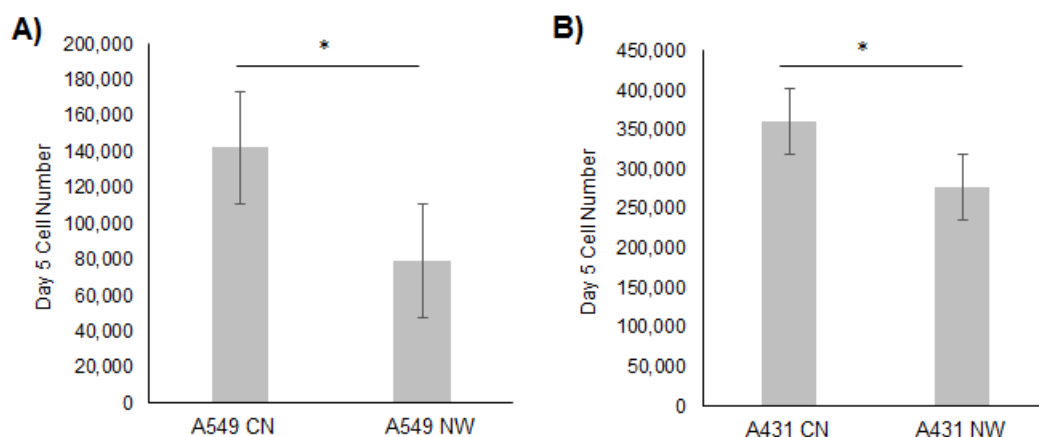

**Figure S1.** Exogenous expression of N-WASP in A549 and A431 cells reduced cell proliferation. The graphs show the total cell numbers after 5 days of incubation of (A) A549<sup>CN</sup> and A549<sup>NW</sup> cells, and (B) A431<sup>CN</sup> and A431<sup>NW</sup> cells. All values are the mean  $\pm$  SD,  $n = 3$ , \*  $p < 0.05$ .

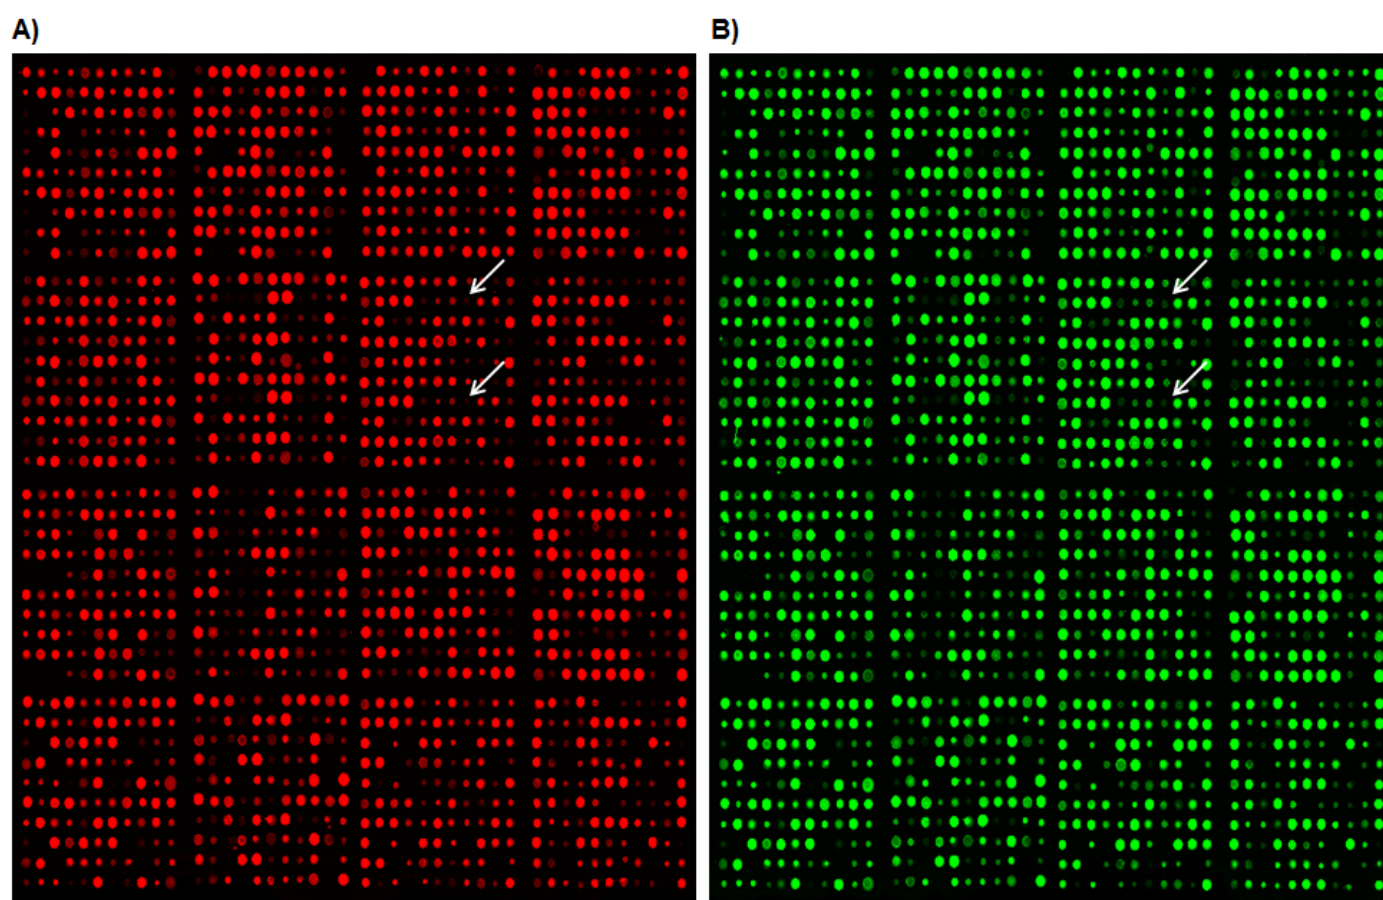

**Figure S2.** Protein microarray of HSC-5<sup>CN</sup> and HSC-5<sup>NW</sup> cell lysates. Labeled protein lysates from (A) HSC-5<sup>CN</sup> (red) and (B) HSC-5<sup>NW</sup> (green) cells were incubated on the Kinex KAM-880 protein microarray, and the microarray was imaged with the Gene Pix Pro 6.0 program. Arrows highlight the duplicate antibody locations for detection and measurement of phospho-Ser319 FOXO1; the magnified images of which are shown in Figure 4A.

**Table S1.** List of proteins dysregulated in HSC-5<sup>NW</sup> cells compared to HSC-5<sup>CN</sup> cells. HSC-5<sup>NW</sup>/HSC-5<sup>CN</sup> signal ratio values  $\geq 1.5$  (up-regulated) and HSC-5<sup>NW</sup>/HSC-5<sup>CN</sup> signal ratio values  $\leq 0.5$  (down-regulated) were considered significant. The target protein names, their respective phosphorylated site, average detection values of HSC-5<sup>CN</sup> and HSC-5<sup>NW</sup> cells and the HSC-5<sup>NW</sup>/HSC-5<sup>CN</sup> ratio values following the performance of Kinex KAM-880 protein microarray are shown. Phospho-Ser319 FOXO1 is highlighted in blue.

| Target Protein Name  | Phospho Site (Human) | Full Target Protein Name                                                            | HSC-5 <sup>CN</sup> Detection Value | HSC-5 <sup>NW</sup> Detection Value | HSC-5 <sup>NW</sup> /HSC-5 <sup>CN</sup> Ratio |
|----------------------|----------------------|-------------------------------------------------------------------------------------|-------------------------------------|-------------------------------------|------------------------------------------------|
| p70 S6K              | T421/S424            | Ribosomal protein S6 kinase beta-1                                                  | 0.181                               | 0.356                               | 1.970                                          |
| STAT1                | S727                 | Signal transducer and activator of transcription 1 alpha                            | 2.099                               | 4.081                               | 1.944                                          |
| BMX (Etk)            | Y40                  | Bone marrow X protein-tyrosine kinase                                               | 1.175                               | 2.210                               | 1.881                                          |
| Met                  | Y1230/Y1234/Y1235    | Hepatocyte growth factor (HGF) receptor-tyrosine kinase                             | 2.307                               | 4.175                               | 1.809                                          |
| JNK 1/2/3            | T183/Y185            | Jun N-terminus protein-serine kinase (stress-activated protein kinase (SAPK)) 1/2/3 | 2.594                               | 4.613                               | 1.778                                          |
| 4E-BP1               | S65                  | Eukaryotic translation initiation factor 4E binding protein 1 (PHAS1)               | 1.527                               | 2.570                               | 1.683                                          |
| RSK1/2/3             | T573                 | Ribosomal S6 protein-serine kinase 1/2/3                                            | 1.744                               | 2.905                               | 1.666                                          |
| Ezrin                | T567                 | Cytovillin 2                                                                        | 1.529                               | 2.535                               | 1.658                                          |
| FKHR                 | S319                 | Forkhead box protein O1                                                             | 2.286                               | 3.700                               | 1.619                                          |
| Caveolin 1           | Pan-specific         | Caveolin 1                                                                          | 1.911                               | 3.042                               | 1.592                                          |
| Tyrosine Hydroxylase | S40                  | Tyrosine hydroxylase isoform a                                                      | 0.429                               | 0.671                               | 1.565                                          |
| IRS1                 | S312                 | Insulin receptor substrate 1                                                        | 2.532                               | 3.898                               | 1.539                                          |
| CDK1/2               | Y15                  | Cyclin-dependent protein-serine kinase 1/2                                          | 2.210                               | 3.357                               | 1.519                                          |
| S6K                  | T412                 | Ribosomal protein S6 kinase beta-1                                                  | 0.147                               | 0.004                               | 0.029                                          |
| PKCI                 | Pan-specific         | Protein-serine kinase C lambda/iota                                                 | 0.187                               | 0                                   | 0                                              |
| PTPD1                | Pan-specific         | Protein-tyrosine phosphatase non-receptor type 21                                   | 0.222                               | 0                                   | 0                                              |
| RSK1                 | Pan-specific         | Ribosomal S6 protein-serine kinase 1                                                | 0.009                               | 0                                   | 0                                              |
| Yes                  | Pan-specific         | Yamaguchi sarcoma proto-oncogene-encoded tyrosine kinase                            | 0.102                               | 0                                   | 0                                              |

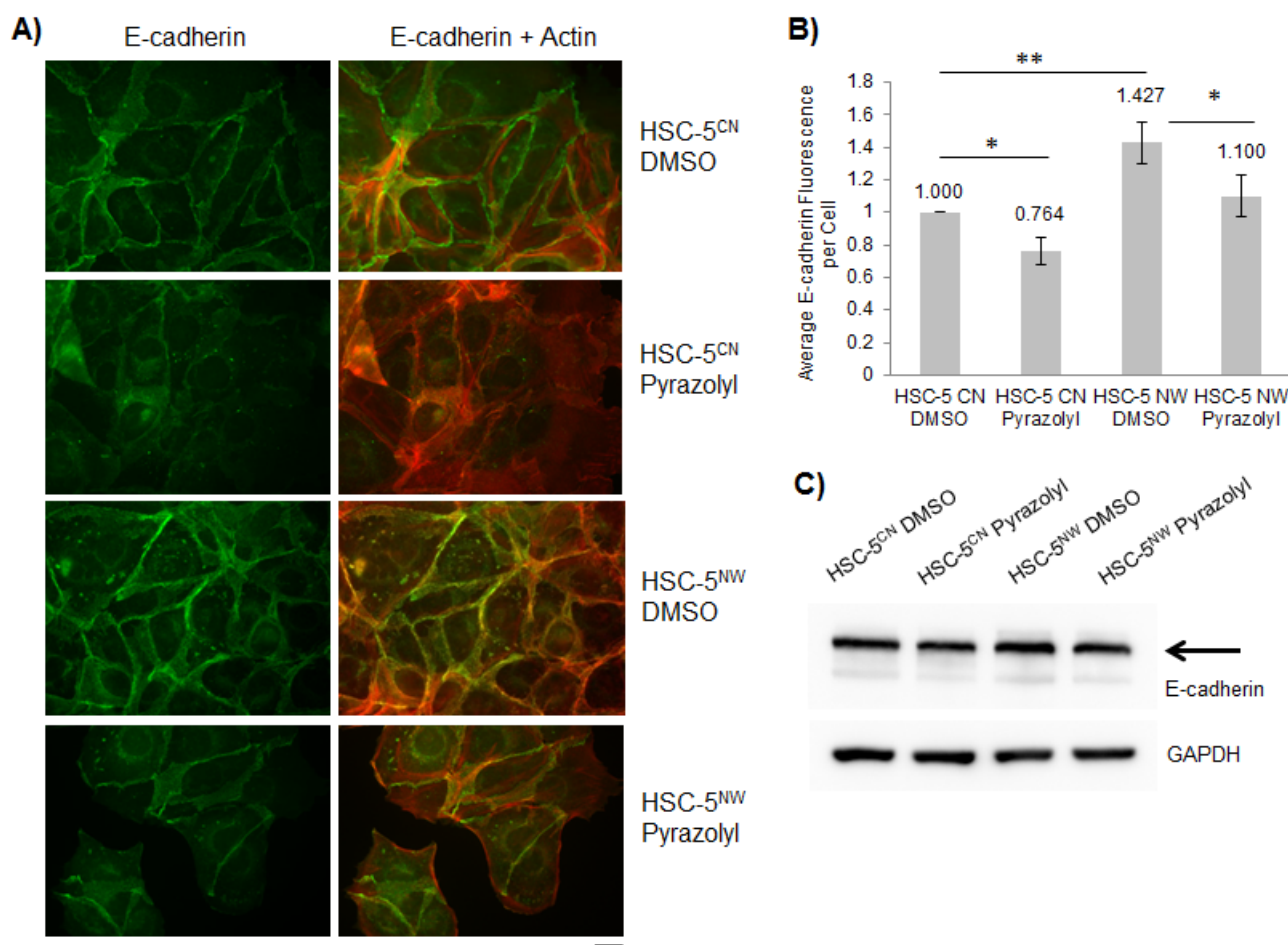

**Figure S3.** Inhibition of ERK2 in HSC-5<sup>NW</sup> cells reduced junctional E-cadherin. **(A)** Representative immunofluorescence images of HSC-5<sup>CN</sup> and HSC-5<sup>NW</sup> cells treated with 2 nM Pyrazolyl or DMSO stained for E-cadherin (green). Actin was stained with Alexa Fluor 568 phalloidin (orange-red). Scale bar represents 20  $\mu$ m,  $n = 3$ . **(B)** Quantification of E-cadherin fluorescence from 20 randomly chosen cells treated as in **(A)** based on the number of interacting cell-cell junctions and normalized to DMSO-treated HSC-5<sup>CN</sup> cells. **(C)** Representative Western blots of E-cadherin and GAPDH (loading control) in HSC-5<sup>CN</sup> and HSC-5<sup>NW</sup> cells treated as in **(A)**;  $n = 3$ . All values are the mean  $\pm$  SD,  $n = 3$ , \*  $p < 0.05$ , \*\*  $p < 0.01$ .

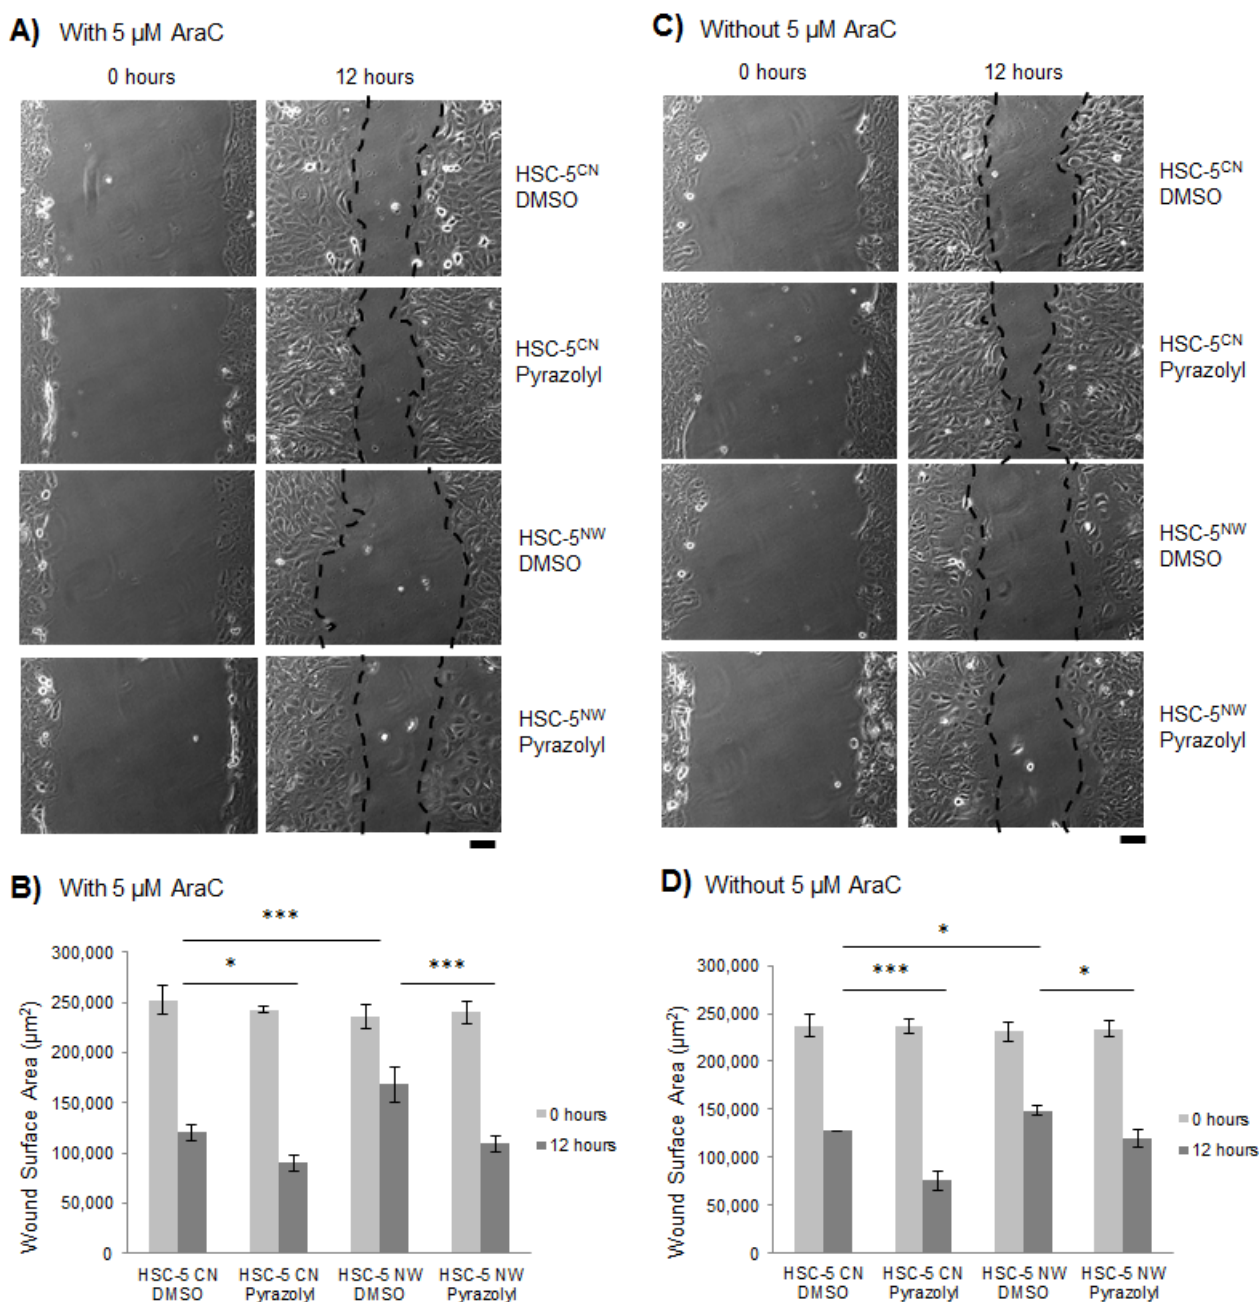

**Figure S4.** Inhibition of ERK2 in HSC-5<sup>NW</sup> cells enhanced cell migration. (A,C) Representative images of in vitro wounds of HSC-5<sup>CN</sup> and HSC-5<sup>NW</sup> cells treated with 2 nM Pyrazolyl or DMSO at 0 and 12 h (A) with and (C) without 5  $\mu$ M of the antiproliferative drug cytosine arabinoside (AraC). Scale bar represents 50  $\mu$ m,  $n = 3$ . (B,D) Quantification of wound areas in (A) and (C) respectively using ImageJ. All values are the mean  $\pm$  SD,  $n = 3$ , \*  $p < 0.05$ , \*\*\*  $p < 0.001$ .

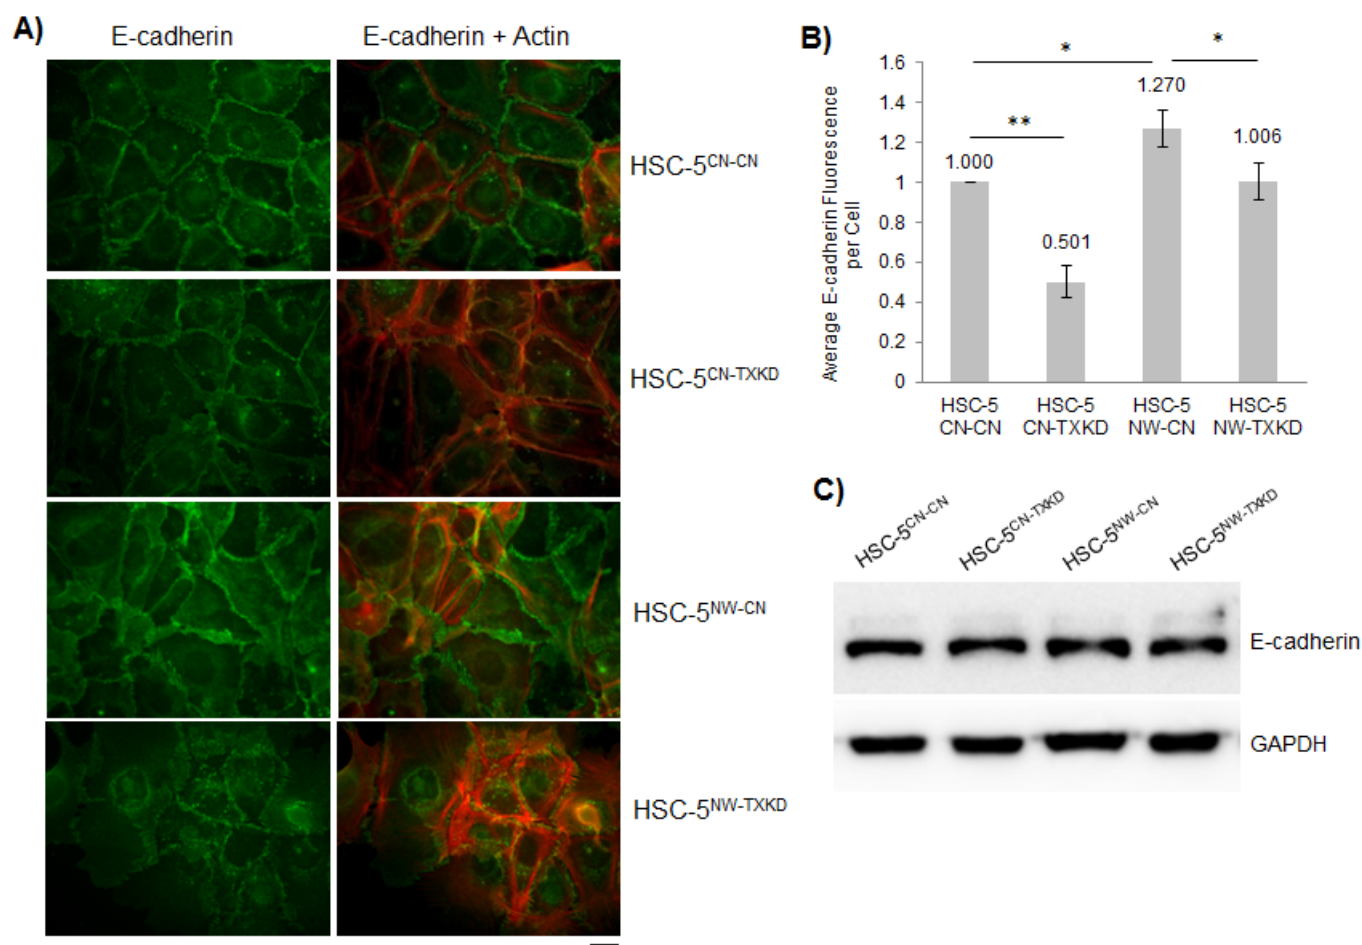

**Figure S5.** Knockdown of TXNIP in HSC-5<sup>NW</sup> cells reduced junctional E-cadherin. **(A)** Representative immunofluorescence images of HSC-5<sup>CN-CN</sup>, HSC-5<sup>CN-TXKD</sup>, HSC-5<sup>NW-CN</sup> and HSC-5<sup>NW-TXKD</sup> cells stained for E-cadherin (green). Actin was stained with Alexa Fluor 568 phalloidin (orange-red). Scale bar represents 20  $\mu$ m,  $n = 3$ . **(B)** Quantification of E-cadherin fluorescence from 20 randomly chosen cells based on the number of interacting cell-cell junctions and normalized to HSC-5<sup>CN-CN</sup> cells. **(C)** Representative Western blots of E-cadherin and GAPDH in HSC-5<sup>CN-CN</sup>, HSC-5<sup>CN-TXKD</sup>, HSC-5<sup>NW-CN</sup> and HSC-5<sup>NW-TXKD</sup> cells;  $n = 3$ . All values are the mean  $\pm$  SD,  $n = 3$ , \*  $p < 0.05$ , \*\*  $p < 0.01$ .

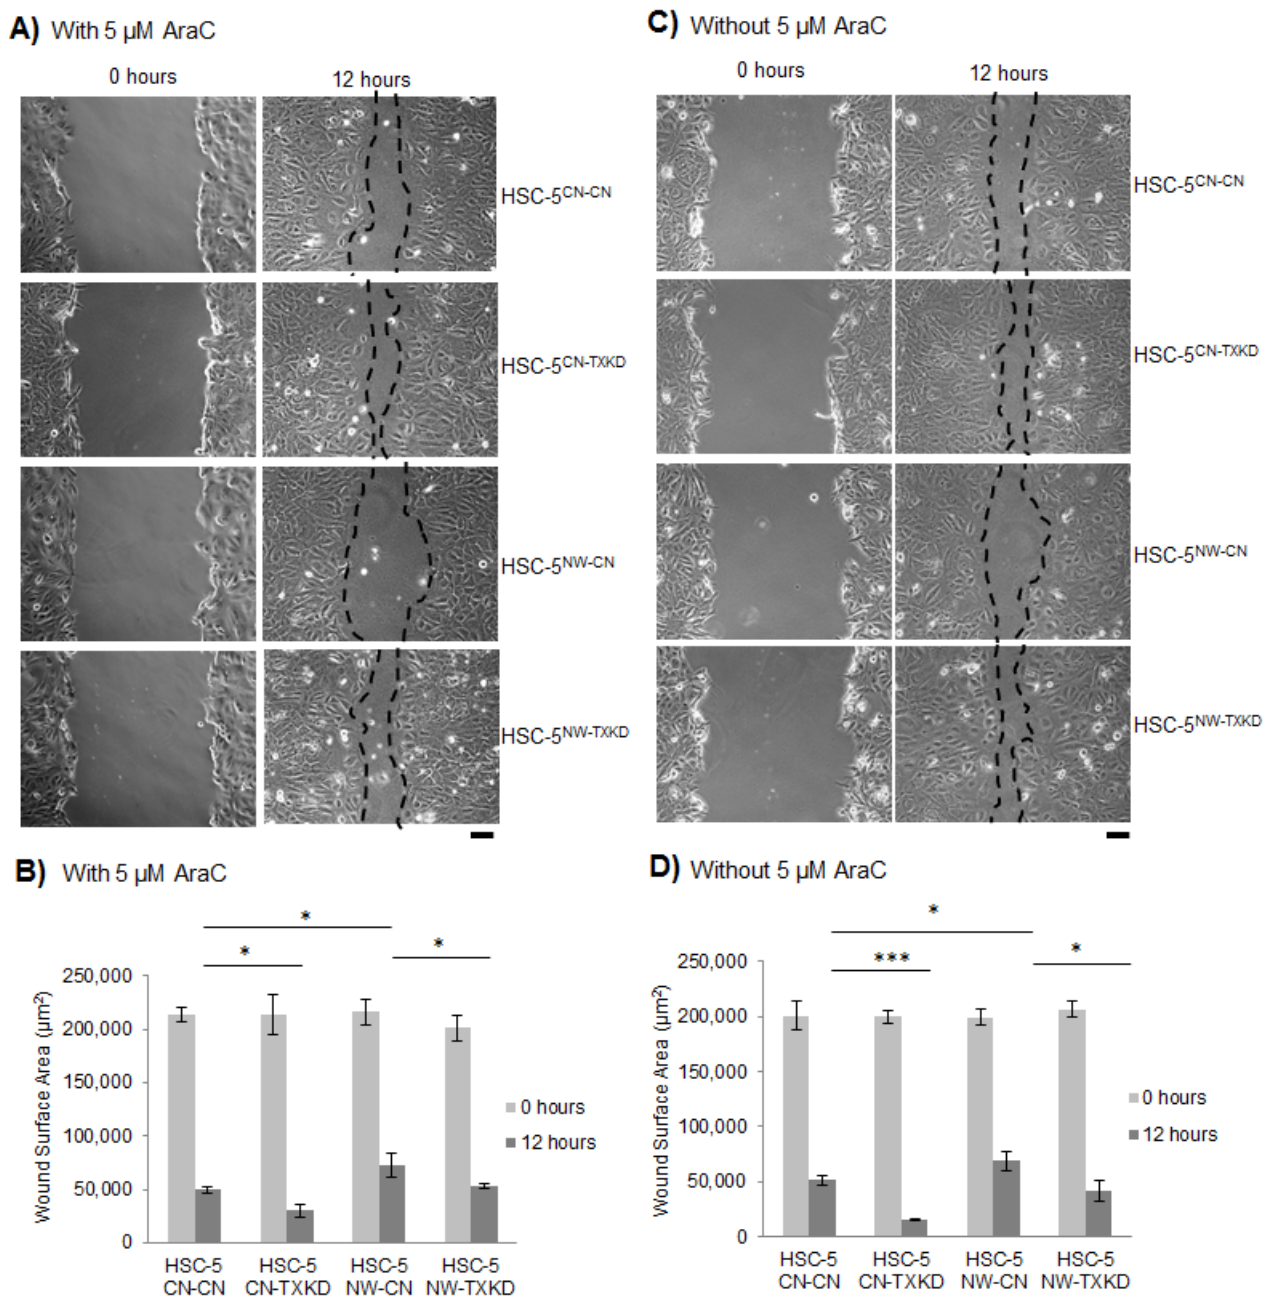

**Figure S6.** Knockdown of TXNIP in HSC-5<sup>NW</sup> cells enhanced cell migration. (A,C) Representative images of in vitro wounds of HSC-5<sup>CN-CN</sup>, HSC-5<sup>CN-TXKD</sup>, HSC-5<sup>NW-CN</sup> and HSC-5<sup>NW-TXKD</sup> cells at 0 and 12 h (A) with and (C) without 5  $\mu$ M of AraC. Scale bar represents 50  $\mu$ m,  $n = 3$ . (B,D) Quantification of wound areas in (A) and (C) respectively using ImageJ. All values are the mean  $\pm$  SD,  $n = 3$ , \*  $p < 0.05$ , \*\*\*  $p < 0.001$
